# Supplementary material
Source: PubMed Central journal article supplement (PMC4059388)

**Supplemental Figure 1. PD-1 does not regulate nitric oxide or cytokine production by macrophage in response to Mtb stimulation.**

WT and PD-1 KO bone marrow derived macrophage were stimulated overnight with increasing doses of recombinant murine IFN $\gamma$  and irradiated Mtb (H37Rv). Nitrate was determined by Griess assay and TNF $\alpha$ , IL-12/23 p40 and IL-10 were measured by ELISA in supernatants.

**Supplemental Figure 2. PD-L1 expression on Mtb-specific CD4 T cells does not regulate their expansion or IFN $\gamma$  expression.**

(A) CD45.1<sup>+</sup> mice were infected with Mtb and on day 6 post-infection a mixture of CFSE labeled CD45.2<sup>+</sup> thy1.1<sup>+</sup> WT P25 (Ag85b specific TCR Tg CD4 T cells) and CD45.2<sup>+</sup> thy1.2<sup>+</sup> PD-L1 KO P25. (B) On day 20 post-infection, donor T cells in mediastinal lymph nodes and lungs were analyzed for CFSE dilution and IFN $\gamma$  production after peptide restimulation.

**Supplemental Figure 3. PD-1 KO CD4 T cells do not suppress WT CD4 T cells during Mtb infection.** (A) Recovery of WT and PD-1 KO donor CD4 T cells the lungs of recipient mice shown in Fig. 6F on day 70 post-infection. (B) Representative plots of IFN $\gamma$  and TNF $\alpha$  production by lung CD4 T cells in (A) after stimulation with PPD. (C) Percentage of lung CD4 T cells producing IFN $\gamma$  after restimulation with PPD or  $\alpha$ CD3. Data are pooled from 2 independent experiments.



# Supplemental Figure 2

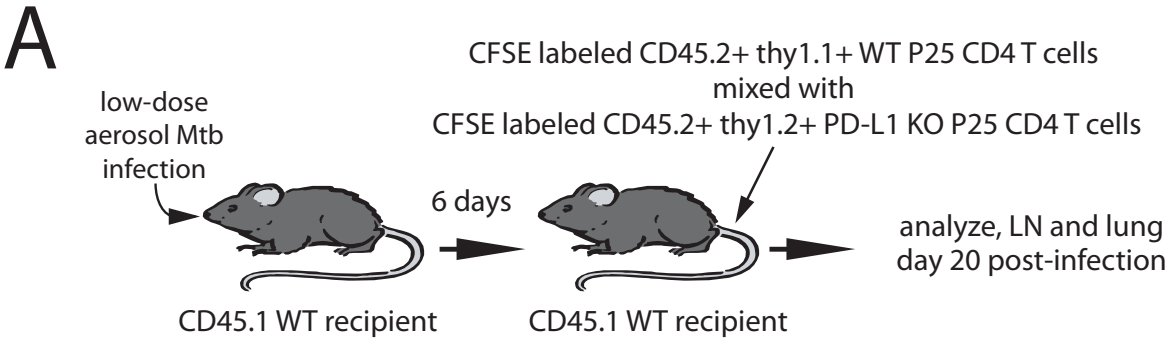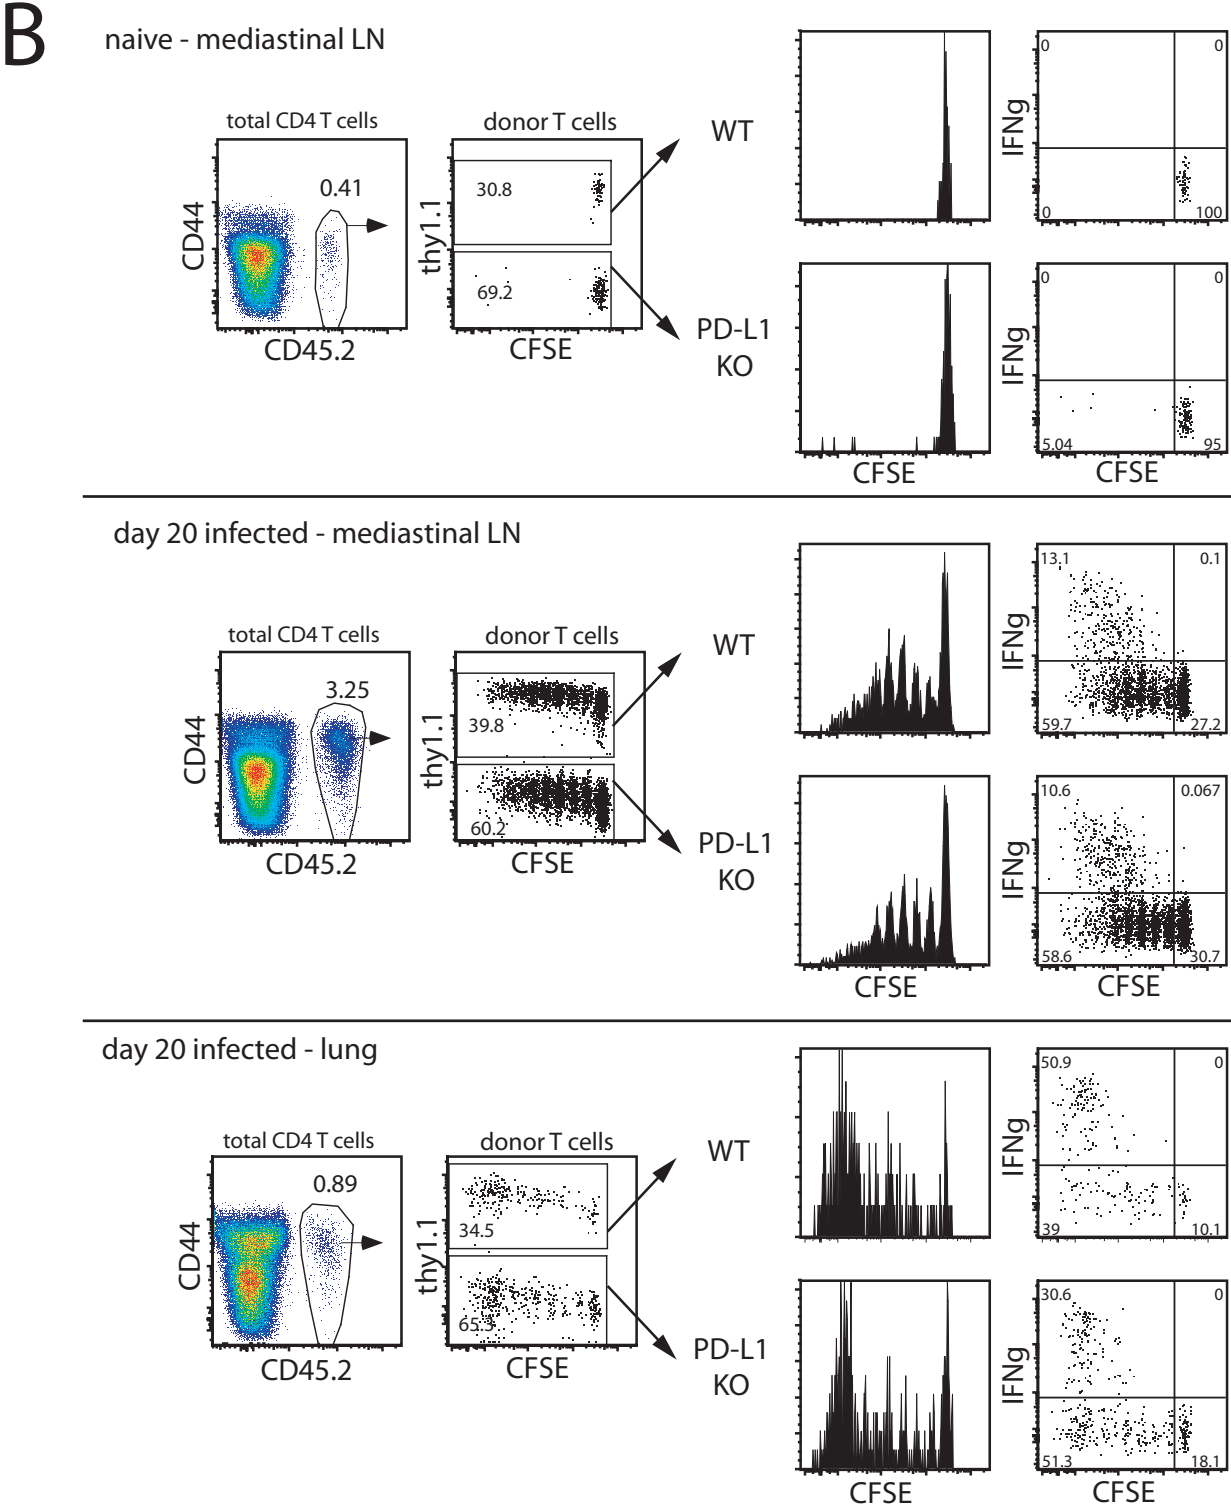

# Supplemental Figure 3

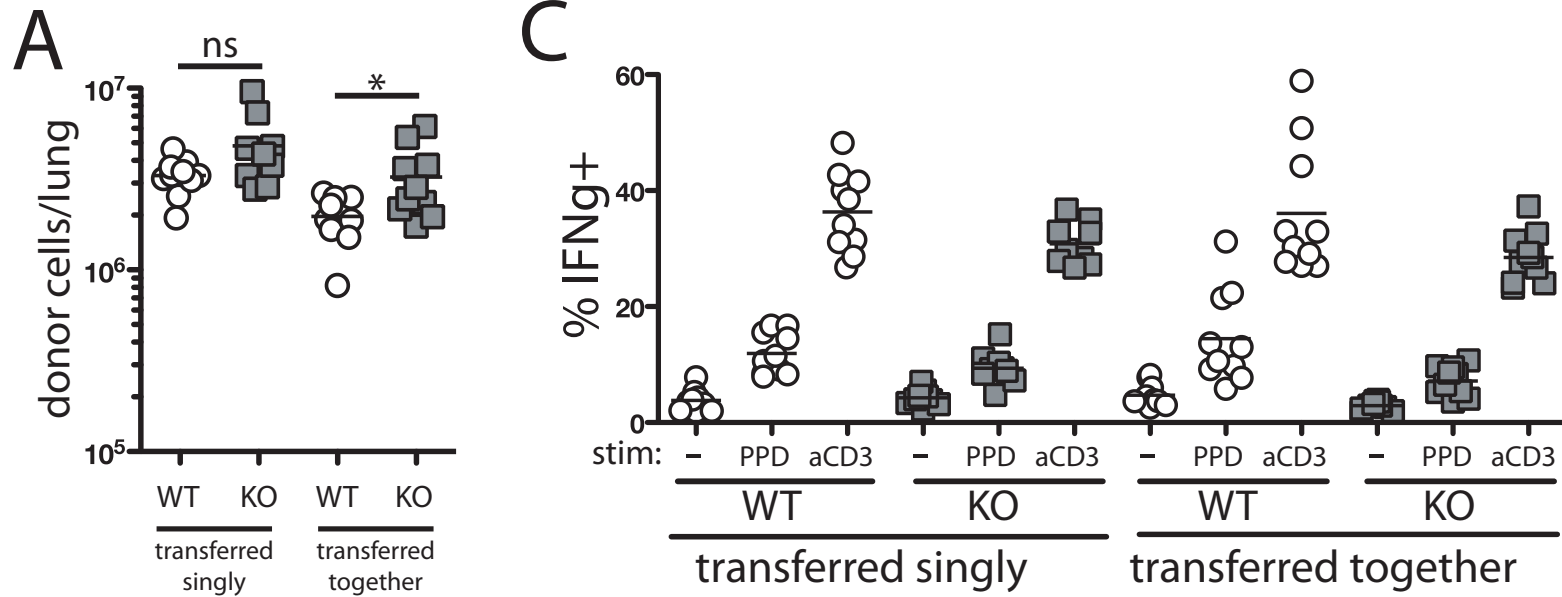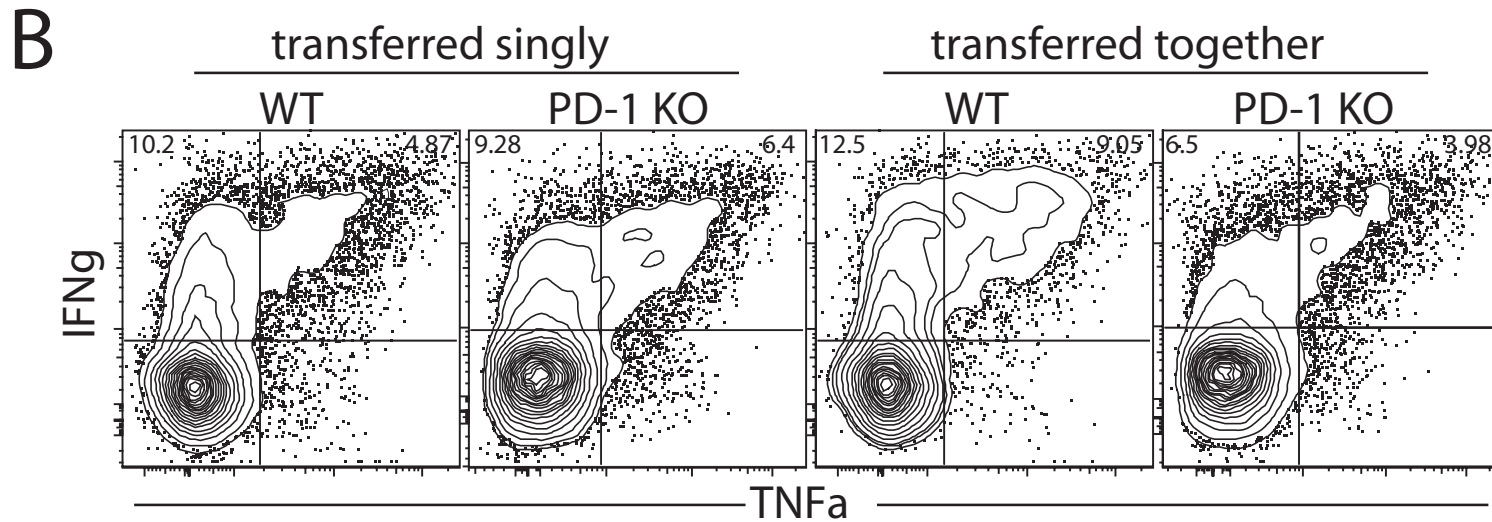

Supplement: NIHMS596377-supplement-01.pdf [file NIHMS596377-supplement-01.pdf]
